# Supplementary material for: A highly efficient and heat-resistant electromagnetic interference shielding carbon nanotube/poly(phenylene sulfide) composite via sinter molding
Source: Royal Society of Chemistry journal article supplement (doi:10.1039/c8tc03493a), 2018-01-01
Supplement: c8tc03493a1.pdf [file c8tc03493a1.pdf]

**Heat resistant, efficient electromagnetic interference shielding  
carbon nanotube/poly(phenylene sulfide) composite *via* sinter  
molding**

Xiao-Peng Zhang,<sup>a</sup> Li-Chuan Jia,<sup>a</sup> Gang Zhang,<sup>b</sup> Ding-Xiang Yan,<sup>\*a,c</sup> and Zhong-Ming Li<sup>a</sup>

<sup>a</sup> College of Polymer Science and Engineering, State Key Laboratory of Polymer Materials Engineering, Sichuan University, Chengdu, 610065, China.

<sup>b</sup> Institute of Materials Science & Technology, Analytical and Testing Center, Sichuan University, Chengdu, 610064, China

<sup>c</sup> School of Aeronautics and Astronautics, Sichuan University, Chengdu 610065, China. E-mail: [yandingxiang@scu.edu.cn](mailto:yandingxiang@scu.edu.cn)

### 1. $T_m$ of original PPS granules

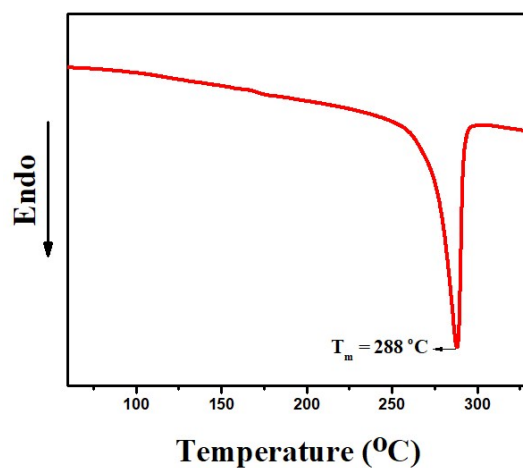

Fig. S1 DSC heating curve of PPS granules

### 2. SEM images of the r-CNT/PPS composite

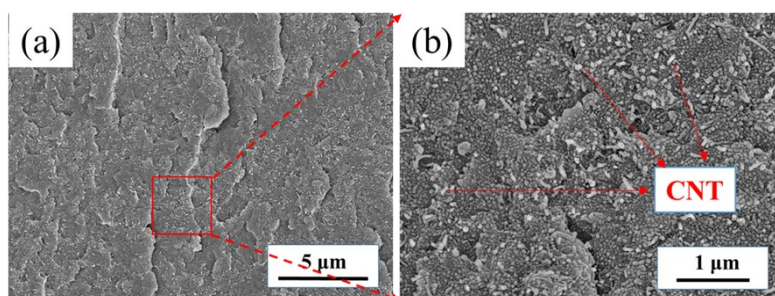

Fig. S2 (a) SEM images of r-CNT/PPS at 5.0 wt% CNT content and (b) the magnified SEM image of the square region in (a).

### 3. OM images of the r-CNT/PPS composites

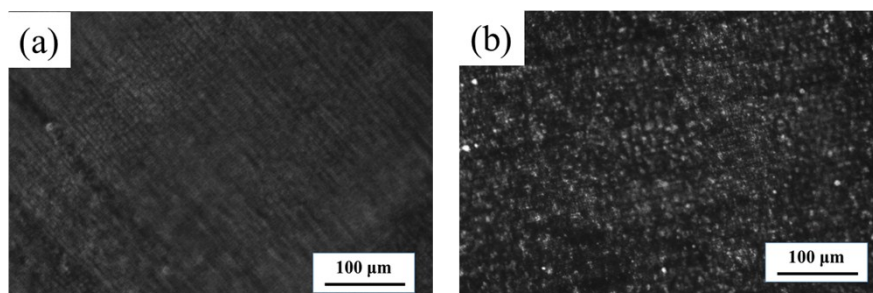

Fig. S3 OM images of r-CNT/PP at (a) 3.0 wt% and (b) 5 wt% CNT content.
